# Supplementary material for: Comparison of co–located rBC and EC mass concentration measurements during field campaigns at several European sites
Source: Copernicus journal article supplement (doi:10.5194/amt-2020-192), 2020-06-25
Supplement: Supplementary file 1 [file amt-2020-192-supplement.pdf]

### S1. Calculation of variability and bias

The variability ( $Q_{AV}$ ) is defined as the relative standard deviation given by the 95 % confidence limit, thus:

$$Q_{AV} = \frac{n}{\sqrt{6}} \left[ \max \left( \frac{RD_i}{T_i} \right) - \min \left( \frac{RD_i}{T_i} \right) \right] \quad (S1)$$

Where  $RD_i = L_i - T_i$ , with  $L_i$  and  $T_i$  representing the laboratory and expected concentrations, respectively.

5 The bias ( $Q_{AB}$ ) is defined as the median of the percentage of the ratio between  $RD_i$  and  $T_i$

$$Q_{AB} = \text{median} \left[ \frac{RD_i}{T_i} \% \right]. \quad (S2)$$

### S2. The Cunningham slip correction

10 The Cunningham slip correction factor,  $C_C$ , is used to account for non-continuum effects when calculating the drag force on small particles.  $C_C$  depends on the particle diameter,  $D$ , the mean free path of the surrounding gas,  $\lambda$ , and on the experimental coefficients  $\alpha$ ,  $\beta$  and  $\gamma$  (Cunningham, 1910; Seinfeld and Pandis, 2006).

$$C_C(D) = 1 + \frac{2\lambda}{D} \left[ \alpha + \beta e^{-\frac{\gamma D}{\lambda}} \right] \quad (S3)$$

with  $\alpha = 1.257$ ,  $\beta = 0.4$ ,  $\gamma = 1.1$ ,  $\lambda = 6.5 \cdot 10^{-8} \text{ m}$

### S3. Hygroscopic growth factor

15 Hygroscopic growth affects the cut-off imposed by impactors operated at ambient RH. Here we provide simplified equations to calculate the volume equivalent diameter growth factor, GF, of BC-containing particles coated with a mixture of organic and inorganic matter. The GF is calculated using  $\kappa$ -Köhler theory (Petters and Kreidenweis, 2007):

$$GF(RH) = \left( 1 + \kappa_{\text{tot}} \frac{RH}{1-RH} \right)^{1/3} \quad (S4)$$

where the hygroscopicity parameter of the mixed particle,  $\kappa_{\text{tot}}$ , is obtained with the ZSR-mixing rule written as (Petters and Kreidenweis, 2007):

$$\kappa_{\text{tot}} = \varepsilon_{\text{BC}} \kappa_{\text{BC}} + \varepsilon_{\text{org}} \kappa_{\text{org}} + \varepsilon_{\text{inorg}} \kappa_{\text{inorg}} \quad (S5)$$

20

The hygroscopicity parameters  $\kappa$  of BC, organics and inorganics are assumed to be 0, 0.1 and 0.5, respectively (Engelhart et al., 2012). The volume fraction,  $\varepsilon_x$ , of compound class “x” in the particle can be calculated using:

$$\varepsilon_x = \frac{m_x}{m_{\text{tot}}} \frac{\rho_{\text{tot}}}{\rho_x} \quad (S6)$$

25 where  $m_x$  is the mass of “x” in the particle,  $m_{\text{tot}}$  is the total particle mass.  $\rho_x$  is the material density of “x”, which is assumed to be  $1800 \text{ kg m}^{-3}$ ,  $1200 \text{ kg m}^{-3}$  and  $1700 \text{ kg m}^{-3}$  for BC, organics and inorganics, respectively. The mixed particle density,  $\rho_{\text{tot}}$ , is obtained with:

$$\rho_{\text{tot}} = \frac{1}{\frac{m_{\text{BC}}}{m_{\text{tot}}} \rho_{\text{BC}} + \frac{m_{\text{org}}}{m_{\text{tot}}} \rho_{\text{org}} + \frac{m_{\text{inorg}}}{m_{\text{tot}}} \rho_{\text{inorg}}} \quad (S7)$$

#### S4. Dryers and losses

Differences in  $m_{\text{rBC}}$  and  $m_{\text{EC}}$  mass concentration can also come from differences in the losses of the respective sampling inlets. Particle losses can be caused by the presence of a dryer in the inlet line. The dryer technology offers different dryer types including diffusion and membrane dryers. Diffusion dryers use chemical adsorbents such as silica gel for the minimization of aerosol losses. When the aerosol passes through the tube, the silica adsorbs water vapor, therefore this chemical needs to be changed and regenerated on a regular basis. Membrane dryers are elastic tubes based on water vapor-permeable polytetrafluoroethylene (PTFE). Commercially available membranes are products such as Nafion®: a sulfonated tetrafluoroethylene working as permeable membrane in which water vapor molecules are transported.

In any case, particle losses by diffusion across the dryer should be accounted for in the data processing. This is done by calculating an equivalent tube length, which is longer than the actual dryer length (Wiedensohler et al., 2012).

In this work we calculate the diffusion losses when dryers were present in the inlet lines. A diffusion dryer was placed in front of the SP2 line during the Bologna campaign; while the EC line had none. The particle transmission efficiency of the diffusion dryer for a flow rate of  $2 \text{ L min}^{-1}$  was evaluated to be less than 10 % on average on the size range of the SP2 measurements. Nafion dryers (model MD-700, Perma Pure) were set in front of the SP2s in the Melpitz and Cabauw campaigns. The diffusion losses through them were calculated with the hypothesis of laminar flow and were found to be negligible. The particle loss due to the presence of a dryer in the inlet line does not seem to be the main reason of the  $m_{\text{rBC}}$  and  $m_{\text{EC,PM}_{2.5}}$  discrepancies for the campaigns of this study. For this reason we did not correct the rBC mass concentrations for this effect.

Table S1: site, station code, coordinates, altitude and year/season of the field campaigns presented in this work.

| Site (country) | Station code | Coordinates          | Altitude | Year/season                       |
|----------------|--------------|----------------------|----------|-----------------------------------|
| Palaiseau (FR) | SIR          | 48.713° N 2.208° E   | 160      | 2010/winter                       |
| Melpitz (DE)   | MEL          | 51°32' N, 12°56' E   | 86       | 2017/winter<br>and<br>2015/summer |
| Cabauw (NE)    | CBW          | 51° 58' N, 4° 55' E  | −0.7     | 2016/autumn                       |
| Bologna (IT)   | BOL          | 44° 31' N, 11° 20' E | 39       | 2017/summer                       |

Table S2: The first three columns show median, 10<sup>th</sup> and 90<sup>th</sup> percentiles of EC, TC and EC/TC filter loading. The last four columns show minima and maxima of EC and TC filter loadings for the field campaigns of this study.

| Station code  | EC<br>filter loading<br>median<br>(10 <sup>th</sup> , 90 <sup>th</sup> )<br>[μg cm <sup>−2</sup> ] | TC<br>filter loading<br>median<br>(10 <sup>th</sup> , 90 <sup>th</sup> )<br>[μg cm <sup>−2</sup> ] | EC/TC<br>filter loading<br>median<br>(10 <sup>th</sup> , 90 <sup>th</sup> )<br>[μg cm <sup>−2</sup> ] | Min EC<br>filter load<br>[μg cm <sup>−2</sup> ] | Max EC<br>filter load<br>[μg cm <sup>−2</sup> ] | Min TC<br>filter load<br>[μg cm <sup>−2</sup> ] | Max TC<br>filter load<br>[μg cm <sup>−2</sup> ] |
|---------------|----------------------------------------------------------------------------------------------------|----------------------------------------------------------------------------------------------------|-------------------------------------------------------------------------------------------------------|-------------------------------------------------|-------------------------------------------------|-------------------------------------------------|-------------------------------------------------|
| SIR           | 1.66<br>(0.76, 3.19)                                                                               | 9.79<br>(5.02, 24.03)                                                                              | 0.14<br>(0.09, 0.30)                                                                                  | 0.44                                            | 7.53                                            | 3.72                                            | 37.56                                           |
| MEL winter    | 4.30<br>(1.50, 11.08)                                                                              | 44.73<br>(9.77, 110.72)                                                                            | 0.11<br>(0.09, 0.17)                                                                                  | 0.93                                            | 12.53                                           | 5.45                                            | 115.03                                          |
| MEL<br>summer | 0.90<br>(0.48, 1.43)                                                                               | 12.47<br>(6.93, 19.08)                                                                             | 0.08<br>(0.05, 0.10)                                                                                  | 0.25                                            | 2.30                                            | 4.76                                            | 24.43                                           |
| CBW           | 1.47<br>(0.71, 2.34)                                                                               | 6.87<br>(3.78, 14.95)                                                                              | 0.18<br>(0.12, 0.29)                                                                                  | 0.48                                            | 3.44                                            | 2.92                                            | 19.10                                           |
| BOL           | 2.49<br>(1.84, 2.66)                                                                               | 15.50<br>(13.20, 17.72)                                                                            | 0.16<br>(0.11, 0.19)                                                                                  | 1.63                                            | 2.74                                            | 12.46                                           | 18.42                                           |

50

Table S3: In this table the aerodynamic particle diameter  $D_{aero}$  corresponding to the upper SP2 cut-off, which depends on the BC mass equivalent diameter,  $D_{ve}$  (calculating starting from the BC core mass equivalent diameter,  $D_{rBC}$ , knowing the particle mixing state), is given for different extreme hypotheses concerning particle shape ( $\chi$ ), mixing state and relative humidity (RH). The calculations are made with the hypothesis of fixed density of BC core  $\rho_{rBC} = 1800 \text{ kg m}^{-3}$  and with the hypothesis of coating made by half organic material with  $\kappa_{org} = 0.1$  and  $\rho_{org} = 1200 \text{ kg m}^{-3}$  and half inorganic material with  $\kappa_{inorg} = 0.5$  and  $\rho_{inorg} = 1700 \text{ kg m}^{-3}$ . From these hypothesis and knowing the ratio between the mass of the coating material,  $m_{coat}$  and the mass of the BC core,  $m_{rBC}$ , the total particle density,  $\rho_p$ , can be calculated. The mixing state of the last example particle is constrained with SP2 measurements during the Melpitz winter campaign.

55

|                                                                                                                                          | $D_{rBC}$<br>[nm] | $\rho_p$<br>[kg m <sup>−3</sup> ] | $\kappa_{tot}$ | $D_{ve}$<br>[nm]<br>Dry | GF<br>(RH = 80 %) | $D_{ve}$ [nm]<br>(RH = 80 %) | GF<br>(RH = 95 %) | $D_{ve}$ [nm]<br>(RH = 95 %) | $D_{aero}$<br>[nm]<br>Dry | $D_{aero}$ [nm]<br>(RH = 80 %) | $D_{aero}$ [nm]<br>(RH = 95 %) |
|------------------------------------------------------------------------------------------------------------------------------------------|-------------------|-----------------------------------|----------------|-------------------------|-------------------|------------------------------|-------------------|------------------------------|---------------------------|--------------------------------|--------------------------------|
| Fractal-like pure BC:<br>$\chi = 2.4$ (Park et al., 2003)                                                                                | 722.0             | 1800.0                            | 0.0            | 722.0                   | 1.0               | 722.0                        | 1.0               | 722.0                        | 625.3                     | 625.3                          | 625.3                          |
| Spherical pure BC: $\chi = 1$                                                                                                            | 722.0             | 1800.0                            | 0.0            | 722.0                   | 1.0               | 722.0                        | 1.0               | 722.0                        | 968.7                     | 968.7                          | 968.7                          |
| Coated BC: $\chi = 1$ ,<br>$m_{coat} = m_{rBC}$                                                                                          | 722.0             | 1579.4                            | 0.1            | 909.7                   | 1.2               | 1063.1                       | 1.6               | 1423.4                       | 1143.2                    | 1336.0                         | 1788.8                         |
| Coated BC: $\chi = 1$ ,<br>$m_{coat} = 6m_{rBC}$                                                                                         | 722.0             | 1452.2                            | 0.2            | 1381.1                  | 1.2               | 1722.4                       | 1.8               | 2432.5                       | 1664.4                    | 2075.6                         | 2931.3                         |
| Coated BC with coating as<br>observed during the<br>Melpitz Winter campaign:<br>$\chi = 1$ , $m_{coat} = 2.33$ [0.99–<br>3.17] $m_{rBC}$ | 722.0             | 1505.2                            | 0.2            | 1078.2                  | 1.2               | 1310.4                       | 1.7               | 1815.9                       | 1322.8                    | 1607.7                         | 2227.9                         |

Table S4: AAE (470,950) statistics for the campaigns in this study: median, geometric mean, 10<sup>th</sup> and 90<sup>th</sup> percentiles and number of data points.

|                     | SIR               | CBW               | MEL summer        | MEL winter        | BOL               |
|---------------------|-------------------|-------------------|-------------------|-------------------|-------------------|
| AAE median (10, 90) | 1.35 (1.24, 1.53) | 1.05 (0.97, 1.12) | 1.19 (1.09, 1.26) | 1.40 (1.28, 1.50) | 1.03 (1.01, 1.07) |
| AAE geometric mean  | 1.36              | 1.04              | 1.18              | 1.38              | 1.04              |
| # points            | 34                | 32                | 49                | 20                | 7                 |

Table S5: Summary of site name, country, SP2 calibration material,  $m_{EC}$  cut-off and TOA thermal protocol, sampling period, site characteristics and geometric mean of the  $m_{rBC}/m_{EC}$  ratio for all the data. \*One data point

|                        | SP2 Calibration Material         | $m_{EC}$ cut-off/<br>TOA Thermal technique | Site name, country         | Season/year and site characteristics           | $m_{rBC}/m_{EC}$ median |
|------------------------|----------------------------------|--------------------------------------------|----------------------------|------------------------------------------------|-------------------------|
| SIR                    | Fullerene Soot                   | PM <sub>2.5</sub> /<br>EUSAAR-2            | Paris, France              | Jan/Feb 2010<br>suburban background            | 1.20                    |
| CBW                    | Fullerene Soot                   | PM <sub>10</sub> /<br>EUSAAR-2             | Cabauw,<br>Netherlands     | Oct 2016<br>rural background                   | 0.53                    |
| BOL                    | Fullerene Soot                   | PM <sub>2.5</sub> /<br>EUSAAR-2            | Bologna, Italy             | July 2017<br>urban background                  | 0.65                    |
| MEL winter             | Fullerene Soot                   | PM <sub>2.5</sub> /<br>EUSAAR-2            | Melpitz, Germany           | Feb 2017<br>rural background                   | 1.29                    |
| MEL summer             | Fullerene Soot                   | PM <sub>2.5</sub> /<br>EUSAAR-2            | Melpitz, Germany           | July 2015<br>rural background                  | 0.97                    |
| Zhang et al. (2016)    | Fullerene Soot                   | PM <sub>2.5</sub> /<br>IMPROVE             | Fresno, California,<br>USA | Jan/Feb 2013<br>urban background               | 0.70                    |
| Miyakawa et al. (2016) | Fullerene Soot                   | PM <sub>2.5</sub> /<br>IMPROVE-like        | Yokosuka, Japan            | Summer 2014<br>June 17 – 27<br>urban           | 1.07                    |
| Sharma et al. (2017)   | Aquadag scaled to Fullerene Soot | PM <sub>1</sub> /<br>EnCan-Total-900       | Nunavut, Canada            | From Mar 2011 to Dec 2013<br>remote site       | 0.55                    |
| Corbin et al. (2019)   | Fullerene Soot                   | PM <sub>1</sub> /<br>IMPROVE-A (washed)    | –                          | Chamber study – four-stroke ship diesel engine | 1.03*                   |
| Laborde et al. (2012b) | Fullerene Soot                   | NIOSH-5040                                 | –                          | Chamber study – CAST soot                      | 1.10*                   |

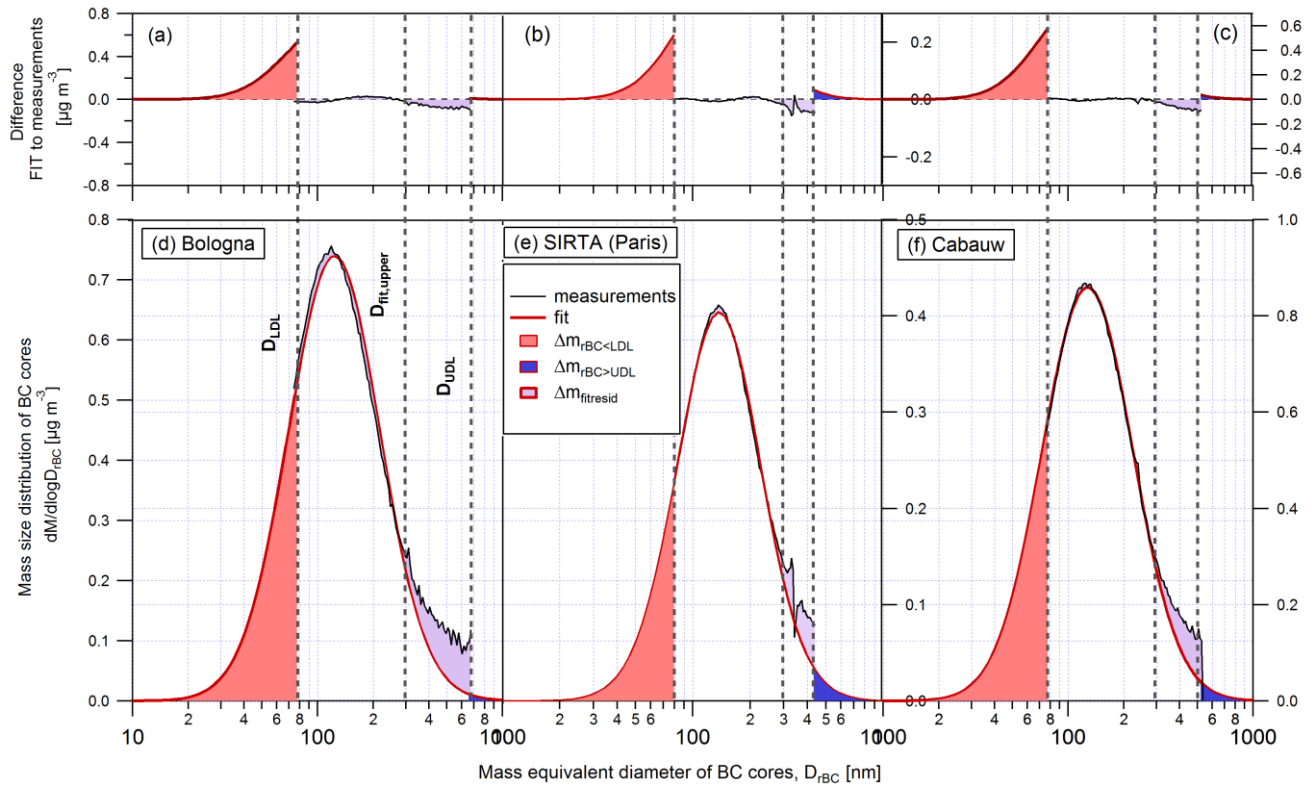

Figure S1: Approach to correct for the rBC mass outside the rBC core size range covered by the SP2 for the Bologna (panels a and d), the Paris (panels b and e) and the Cabauw (panels c and f) campaigns. The bottom three panels show the measured rBC mass size distribution as a function of rBC core mass equivalent diameter, including the SP2 detection limits  $D_{LDL}$  and  $D_{UDL}$ . The lognormal functions are fitted between  $D_{LDL}$  and  $D_{fit,upper}$ . The integrated area of the red, purple, and blue shadings correspond to  $\Delta m_{rBC < LDL}$ ,  $\Delta m_{fitresid}$  and  $\Delta m_{rBC > UDL}$ , respectively (see Sect. 2.3.5). The top three panels additionally show the same shadings after subtraction of the measured size distribution (and measurement forced to be zero outside the SP2 detection range).

80

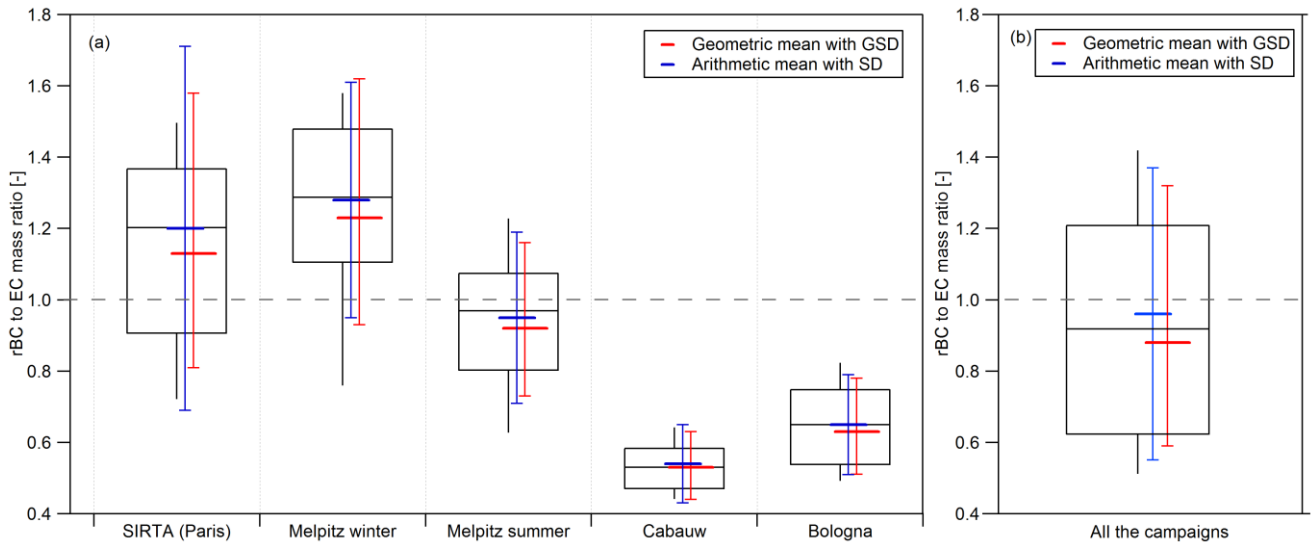

85

Figure S2: Statistics (10<sup>th</sup>, 25<sup>th</sup>, 50<sup>th</sup>, 75<sup>th</sup> and 90<sup>th</sup> percentiles, arithmetic and geometric means, SD and GSD) of the rBC to EC mass ratio ( $m_{rBC}/m_{EC}$ ) per campaign (panel a) and with all the campaigns of this work (panel b).

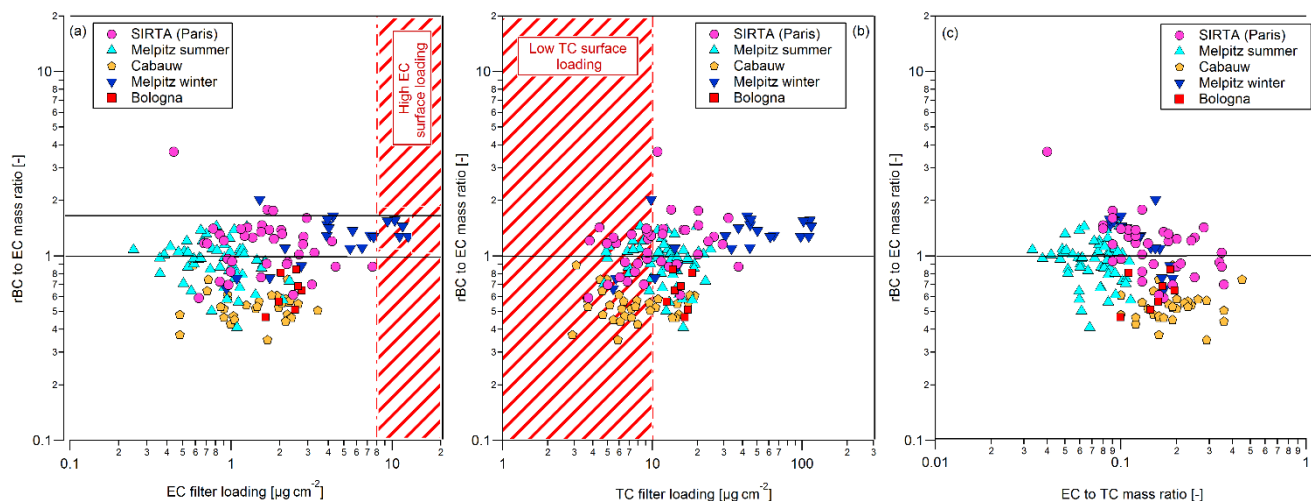

Figure S3: rBC mass concentration versus EC filter loading (panel a), TC filter loading (panel b) and EC/TC mass ratio (panel c). The red shaded areas in panel (a) and (b) indicate the high EC surface loading and the low TC surface loading areas respectively.

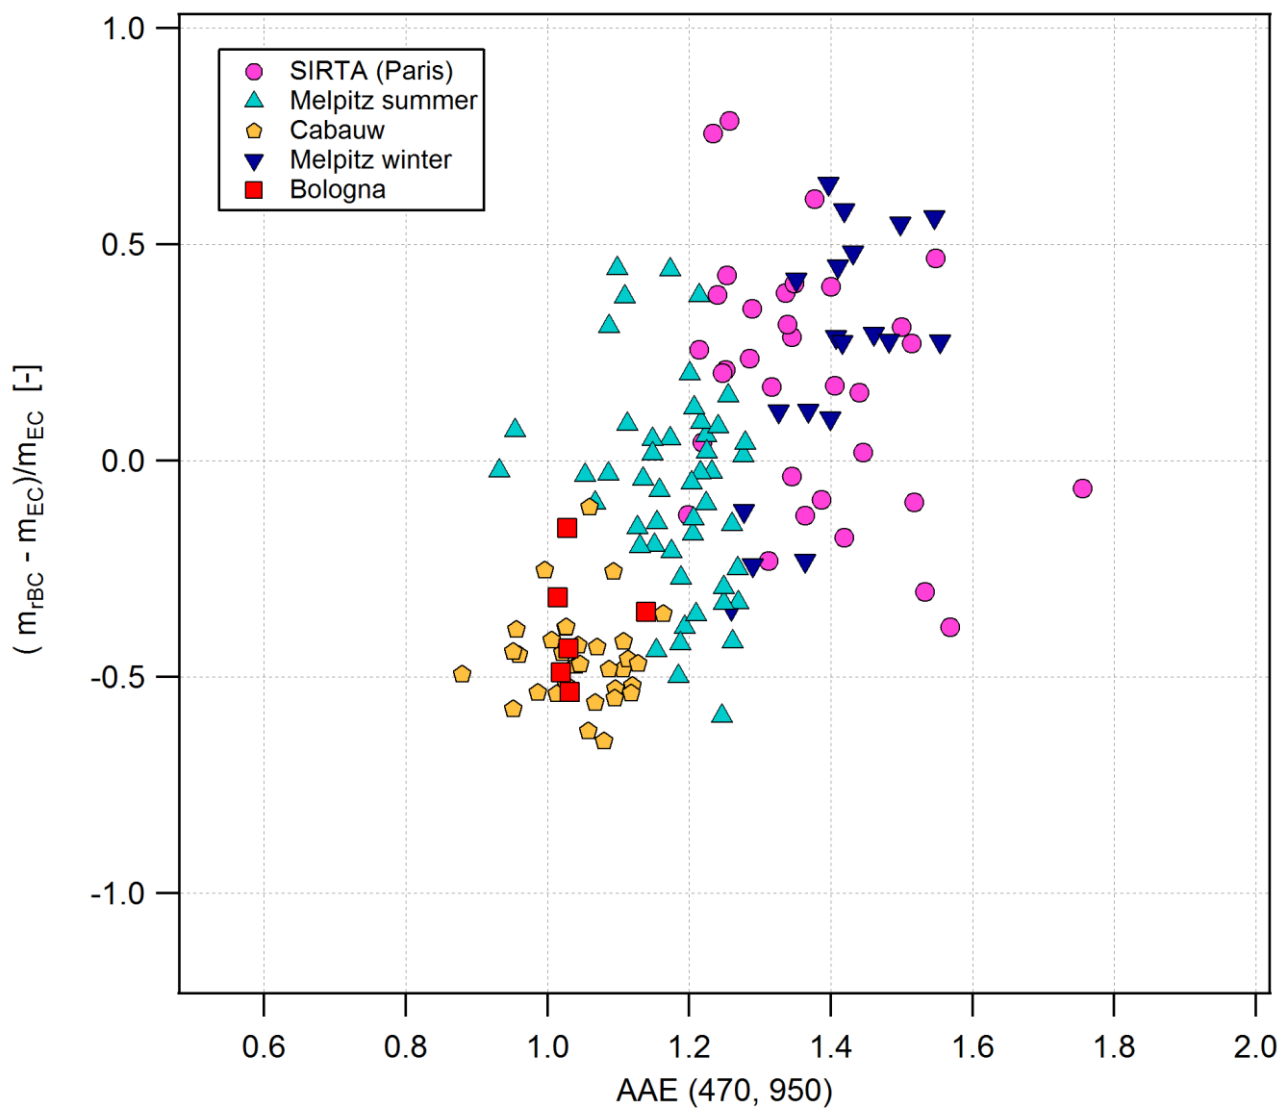

Figure S4: Relative difference between  $m_{\text{rBC}}$  and  $m_{\text{EC}}$  versus the AAE(470,950) coloured by campaign.
